# Supplementary material for: Extracellular Bioelectrical Lexicon: Detecting Rhythmic Patterns within Dermal Fibroblast Populations
Source: Research Square preprint supplement (doi:10.21203/rs.3.rs-3286884/v1), 2023-10-03
Supplement: Supplementary file 1 [file 765aab2821122bfda58d2850.docx]

**Supplementary Information**

**Extracellular Bioelectrical Lexicon: Detecting Rhythmic Patterns within Dermal Fibroblast Populations**

Rute Félix a,b), Maria C. Medeiros c) Youssef Elamine c),

Deborah M. Power a,b) and Henrique L. Gomes c)

a) Centro de Ciências do Mar, Universidade do Algarve, 8005-139 Faro, Portugal.

b) Universidade do Algarve, Faculdade de Ciências e Tecnologia, 8005-139 Faro, Portugal.

c) Instituto de Telecomunicações, Departamento de Engenharia Electrotécnica e de Computadores, Universidade de Coimbra, 3030-290 Coimbra, Portugal

This Supplementary Information contains 5 supplementary notes and 6 supplementary figures.

**Note 1**: Details about the opening of fissures in the confluent cell monolayers.

**Note 2**: Details about the signal variability during fissure repair.

**Note 3:** Bioelectrical activity of a cell monolayer under non-inflicted stress.

**Note 4:** Onset of quasi-periodic bursts and master signals.

**Note 5**: Evidence for cooperative signaling.

**Note 1**: **Details about confluent monolayers and the opening of fissures.**

The immortalized fibroblast cell line, BJ-5Ta (ATCC CRL4001TM) are adherent cells that are organized in compact monolayers. The photographs in Figs. S1a) and S1b) highlight the closely packed nature of the cell monolayer, which contains elongated cells in close contact with their neighbours. A digital image taken using fluorescently labeled nuclei and fluorescently labelled cytoskeleton is shown in Fig. S1(b).

Fissures were intentionally created in the confluent monolayer using a soft plastic blade. Fig. S1c) displays a series of optical microscopy images capturing a typical wound inflicted on a cell population. On the left plate, the photograph shows the confluent monolayer before any damage occurred. The middle plate shows the shape of the wound, which resembles a cross. The right photograph presents an image taken 48 hours after the wound was inflicted and demonstrates that the repair of the monolayer is almost concluded.

Due to the mechanical nature of the procedure to make the wound, the shape of the damaged region tends to be irregular and non-uniform across experiments. Additionally, this mechanical method introduces variability in the total wound area between different experiments. Typically, a fissure can have gap regions with a length of up to 2000 μm and a width between 50 and 100 μm.


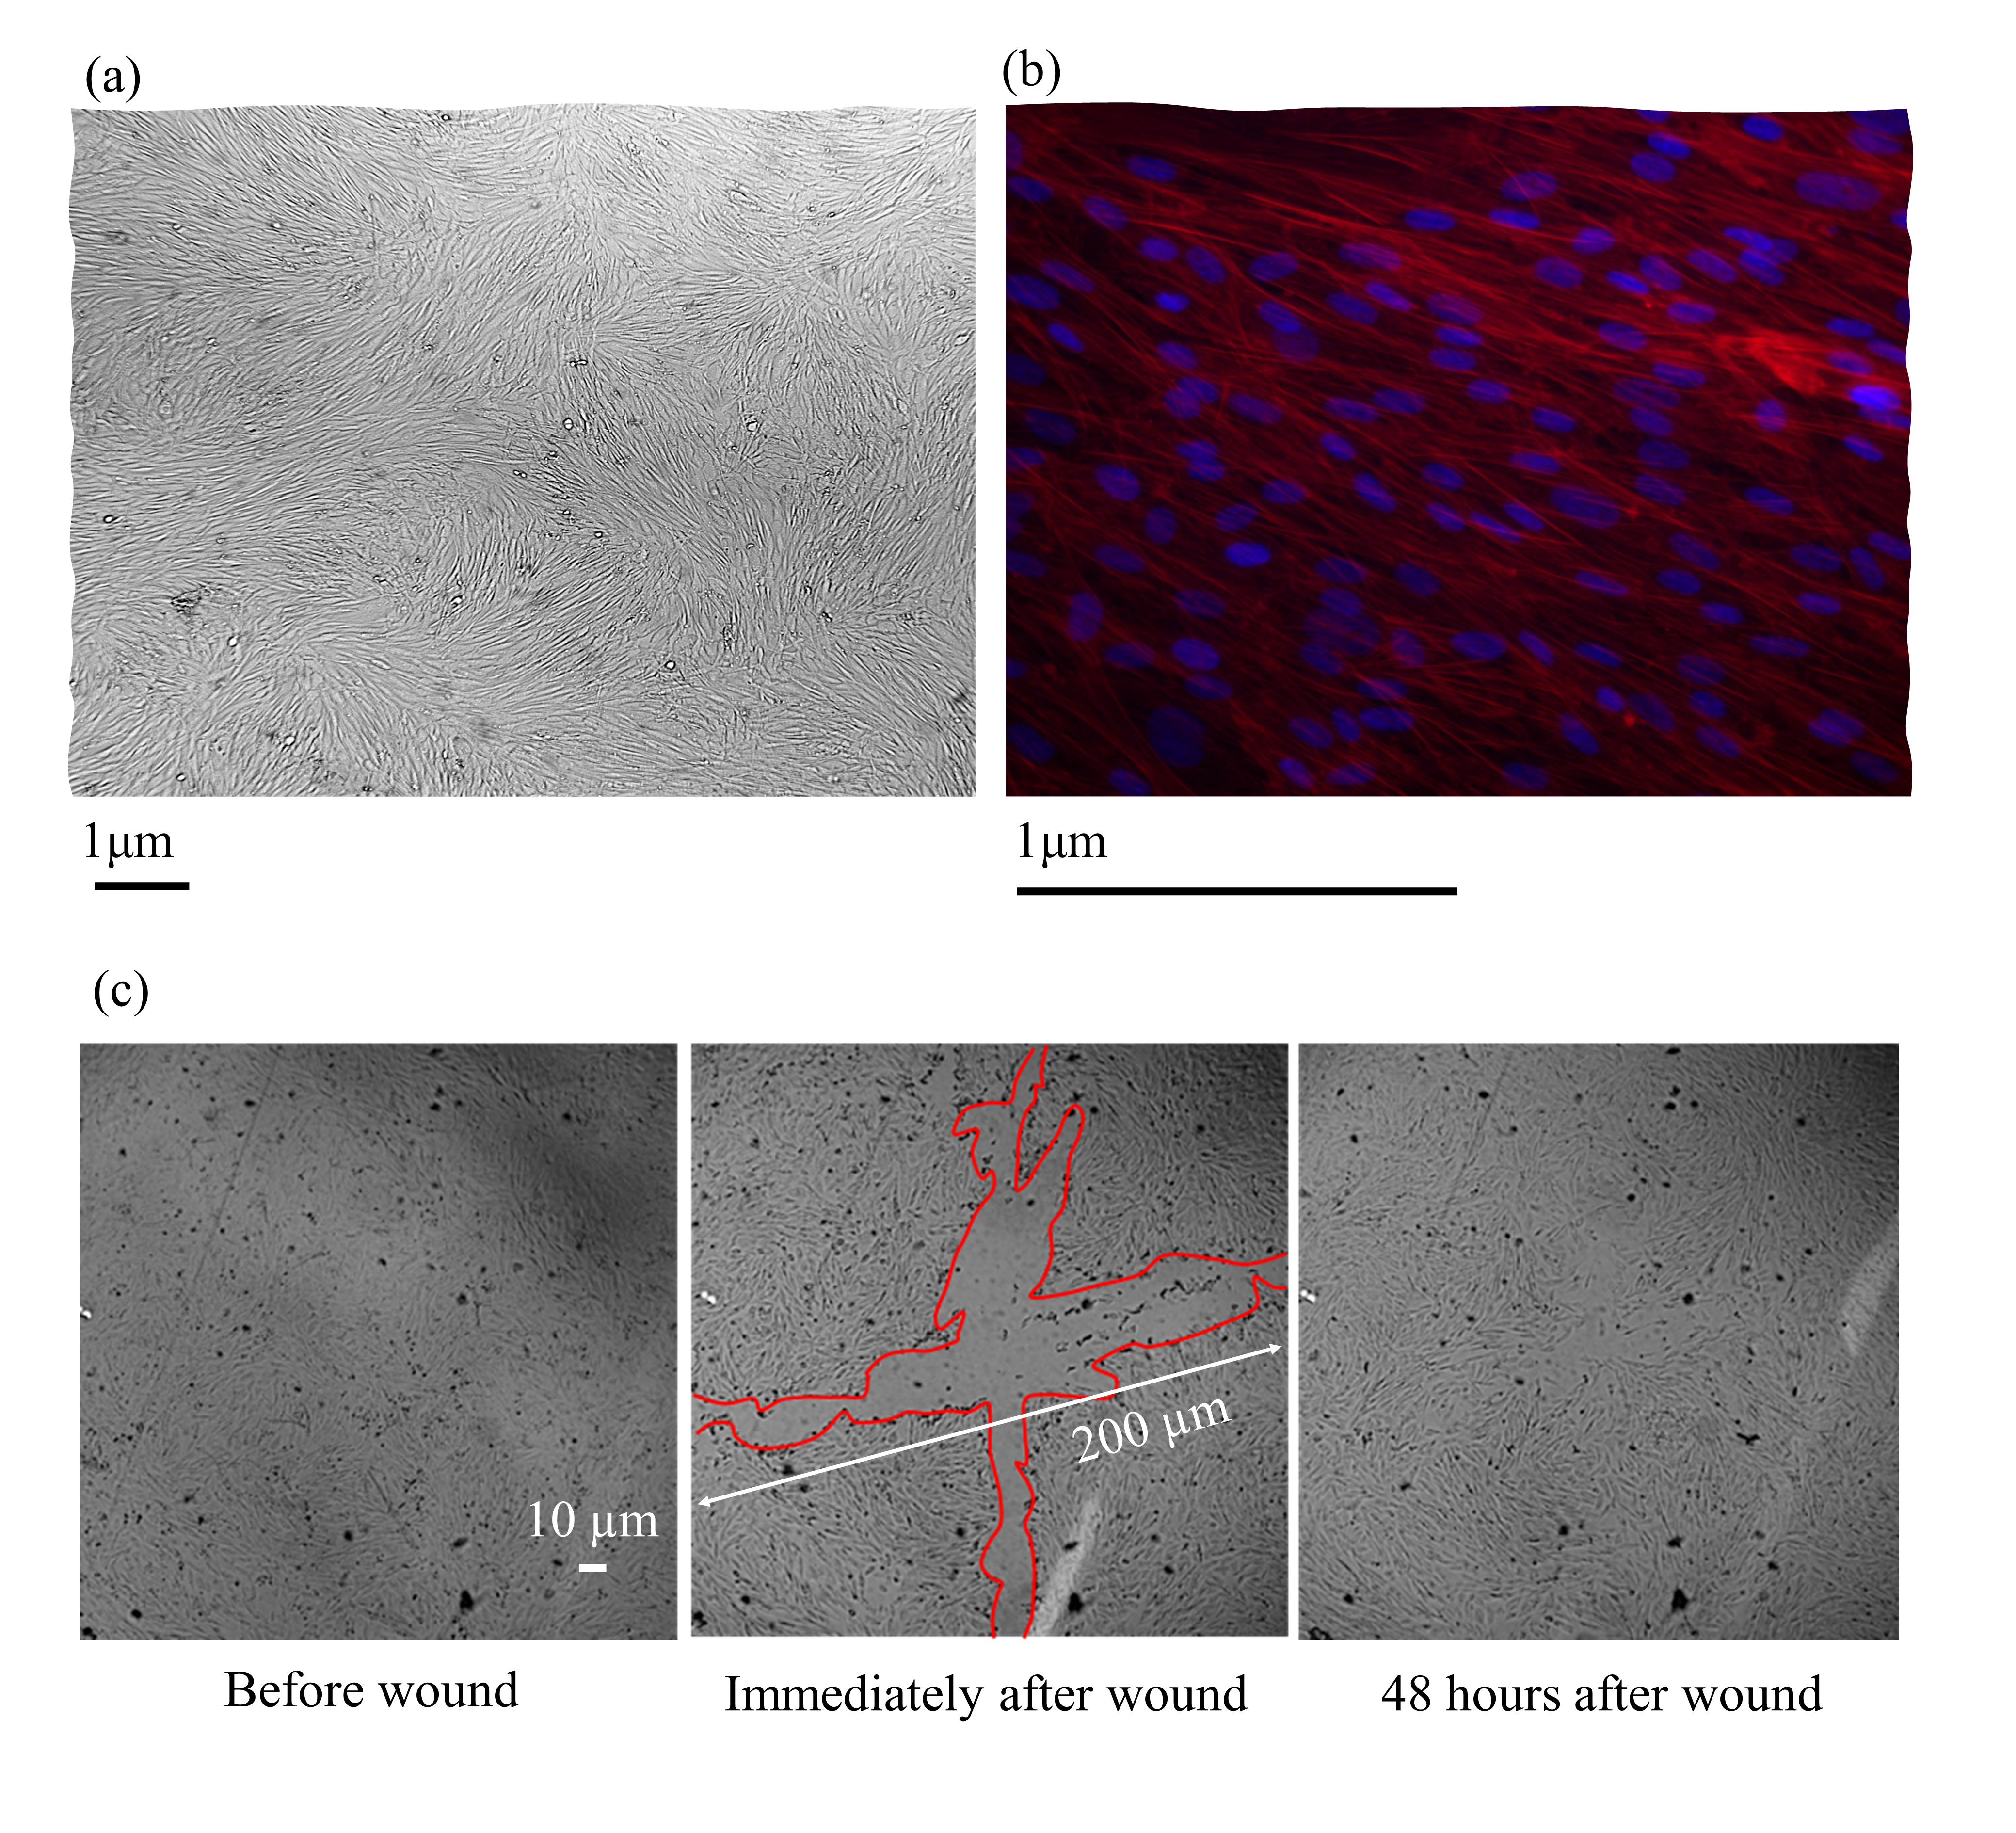


**Figure S1**. Optical photographs of a cell population on the biosensor. (a) Typical compact monolayer. (b) fluorescently labeled nuclei and cytoskeleton. (c) A sequential set of photographs showing the compact cell monolayer, the shape of a typical fissure, and the repaired monolayer 48 hours after the fissure.

**Note 2: Details about the signal variability during wound repair.**

The electrophysiological time traces recorded after inflicting a wound exhibited several distinct types of variability. The first type of variability was associated with the shape of the signal. Other sources of variability arose from the simultaneous occurrence of more than one signal pattern with the same frequency but operating out of phase.


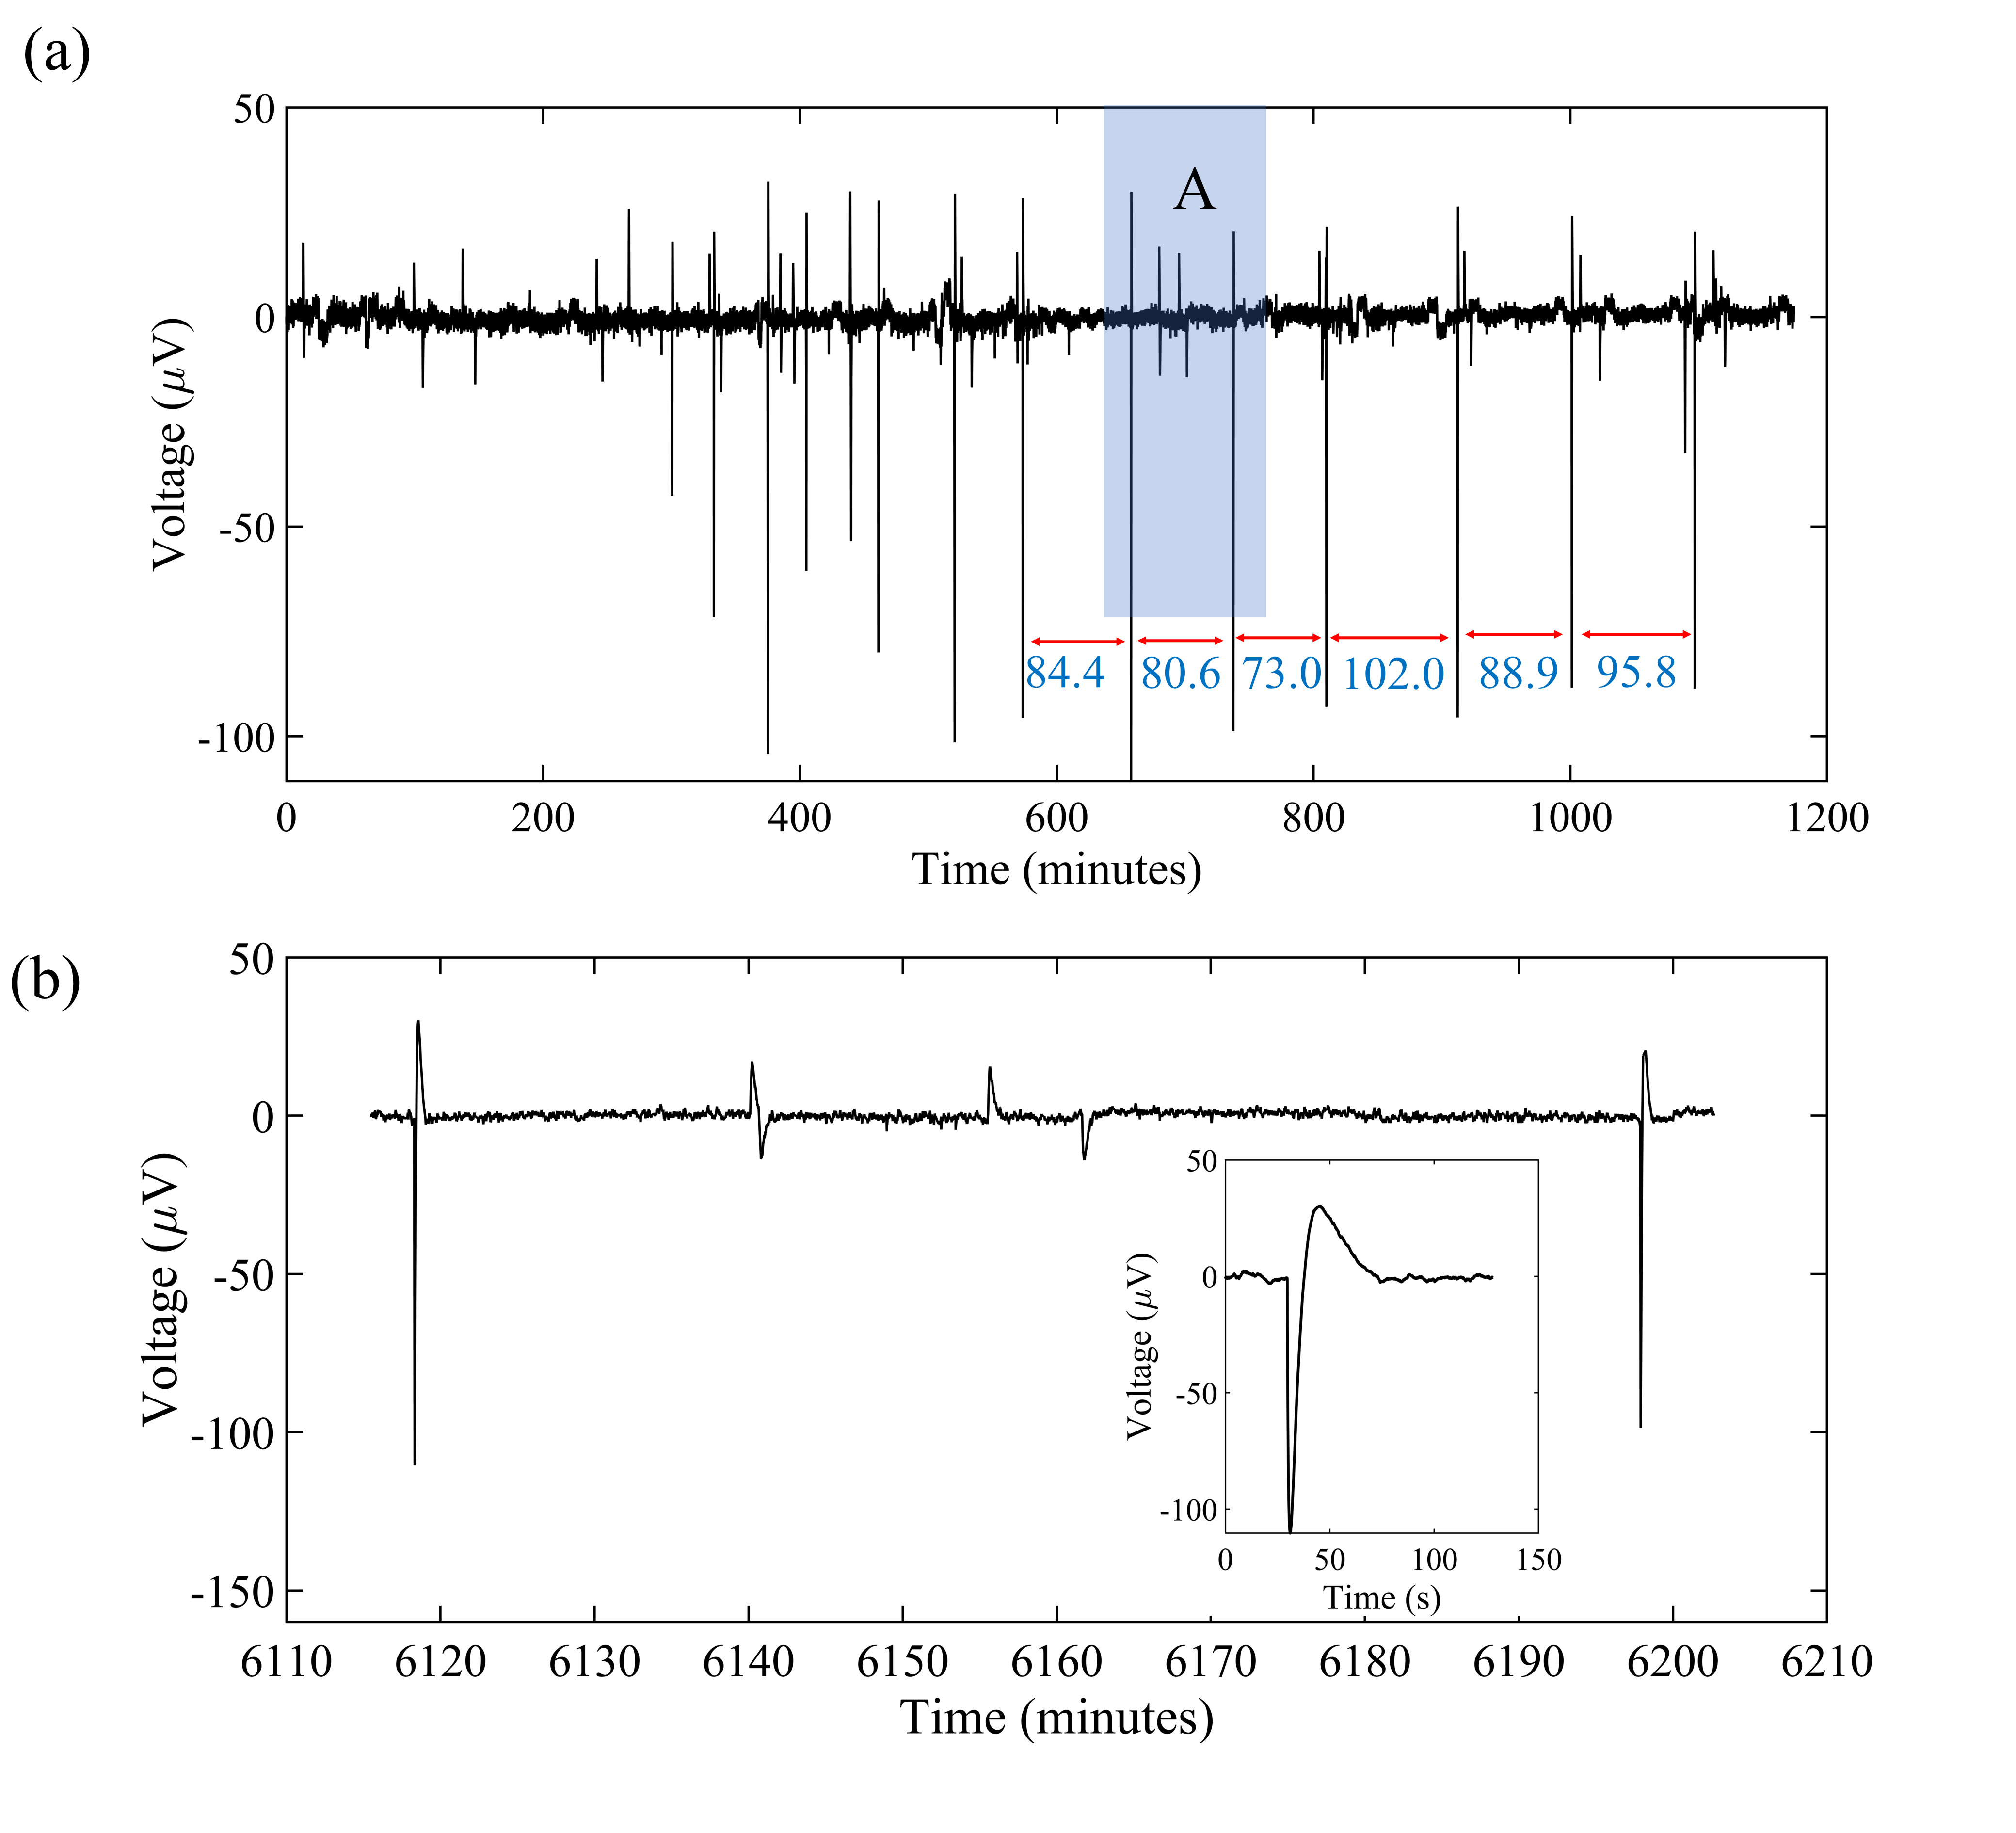
Figure S2 illustrates the first type of variability. It reveals an ultra-slow activity burst (Fig. S2a) with a frequency of 0.2 mHz, precisely matching the frequency mentioned in the main text. However, what sets this burst apart from those reported in the main text is the inversion of the direction of the individual spikes compared to those reported in the main text (Fig. 2c). Specifically, the high amplitude component of the signal is orientated downwards, whereas, in the signals mentioned in the main text, the high amplitude component is orientated upwards. A closer view of the signal shape is depicted in the inset of Fig. S2b), which also shows weaker signals appear in a seemingly random fashion between the main signals. The random signals are usually monophasic, and they can have a downward or upward shape.

**Figure S2**. (a) Ultra-slow burst recorded after a wound. The average interval between signals of 87 minutes (0.19 mHz). Plate (b) is a zoom view of region A highlighted in (a). The inset in (b) depicts the shape of an individual signals. This signal shape is a mirror image of the signals in Fig. 2c.

Compared to the clean electrophysiological signal represented in Fig 2c) where a single quasi-period burst is observed, some experiments revealed a more intricate signaling pattern. In the supplementary electrophysiological time traces additional signals or oscillations emerge randomly amidst the quasi-periodic oscillations. Fig. S3) provides some illustrative examples of the more complex scenarios. Fig. S3a) shows the presence of weak and spurious signals between the two main signals that comprise the quasi-periodic burst. Moreover, the signals can be accompanied by replicas or oscillations, as depicted in the inset of Fig. S3b). The inset clearly displays two signals separated by 60 minutes, each one followed by a series of weak oscillations. Additionally, we encounter situations where more than one pattern existed with identical frequencies but out of phase. A striking example of this behavior is depicted in Fig. 3c), where two patterns with the same frequencies coexist. One pattern is highlighted in blue, while another similar frequency pattern is emphasized in yellow. Between these two patterns, spurious and weak spikes coexist.

Given that our sensing electrodes record populations of up to 3,000 cells, it is reasonable to assume that not all cells are synchronized in identical activities. Consequently, a multitude of signaling patterns is anticipated that reflects the complexity of cell behavior. Moreover, the coexistence of cell clusters engaged in similar activities and coordinated by identical frequencies, albeit out of phase, is also a plausible assumption. The overall time trace recorded captures the simultaneous presence of the diverse signaling patterns across the cell population.


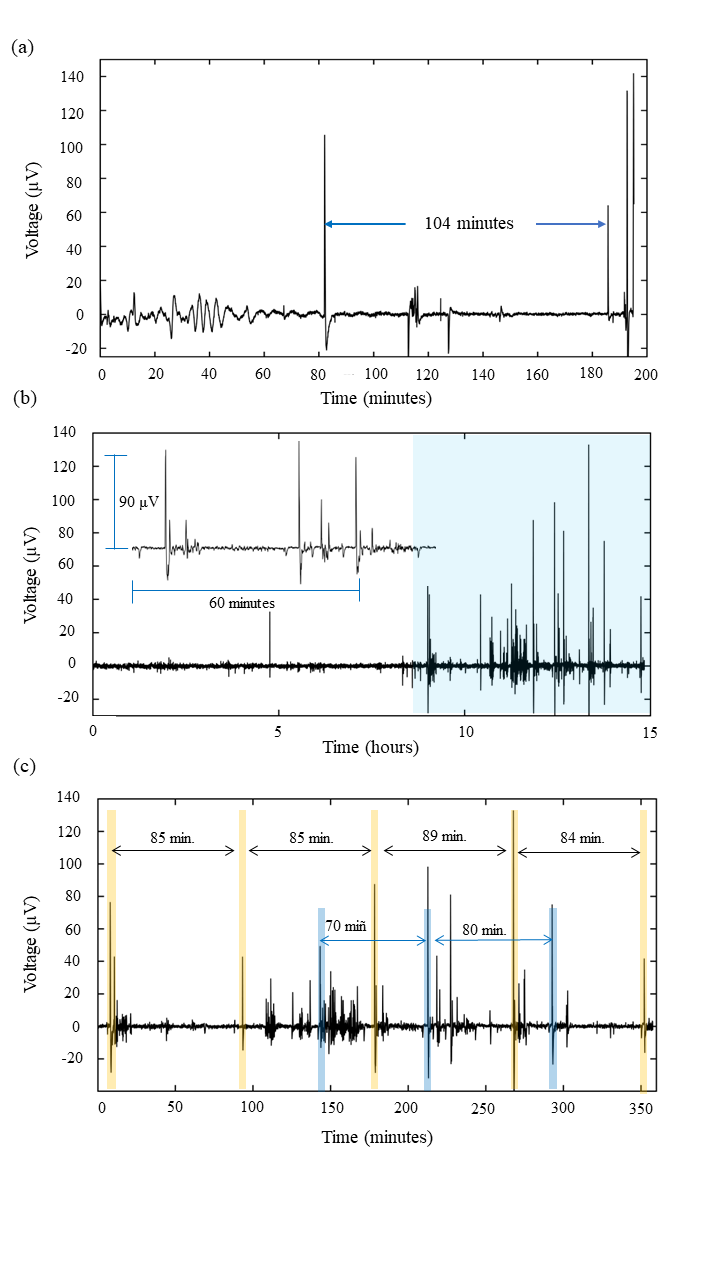
**Figure S3**. An example of a complex signal pattern induced by a wound. Panel (a) shows the presence of weak and random signals between the main signals of the low-frequency burst. Panel (b) shows the signal patterns recorded after the wound, with the inset revealing that each large signal is followed by a series of weaker replicas of the initial signal, and panel (c) provides a detailed view of the signal pattern and displays two mixed-signals each one with a period of approximately 80 minutes. One pattern is highlighted in yellow, and the other is highlighted in blue.

**Note 3. Bioelectrical activity of a cell monolayer under non-inflicted stress**

Well-defined quasi-periodic signal patterns were observed in experiments where the cell monolayer was not stable throughout the duration of the experiment. The instability was evident after differing time periods in different experiments and was characterized by partial cell detachment from the substrate and a change in cell shape from fusiform to a more rounded form, which is indicative of stress.

Fig. S4 is a representative time trace of the bioelectrical signalling in a stressed cell monolayer identified by its premature and partial detachment from the sensing substrate towards the end of the experiment. The signal pattern featured large signals, with amplitudes typically reaching 150 μV. These signals were quasi-periodic and occurred with a period of 43-52 minutes across two consecutive days, although on the third day, the signal shape was inverted (signals highlighted in magenta, Figs. S4b and S4c). The spectral properties of the signal with a rapid upward component, revealed an average time between signals of 51.3 minutes (+ 10.42 standard deviation, SD) and a frequency of 0.35 mHz. For the signals with a fast downward component, the average time between signals was 43.45 minutes (+ 5.46 SD) and the frequency was 0.38 mHz. Despite the observable change in signal shape the average frequency remained constant (Fig. S4d and S4e).


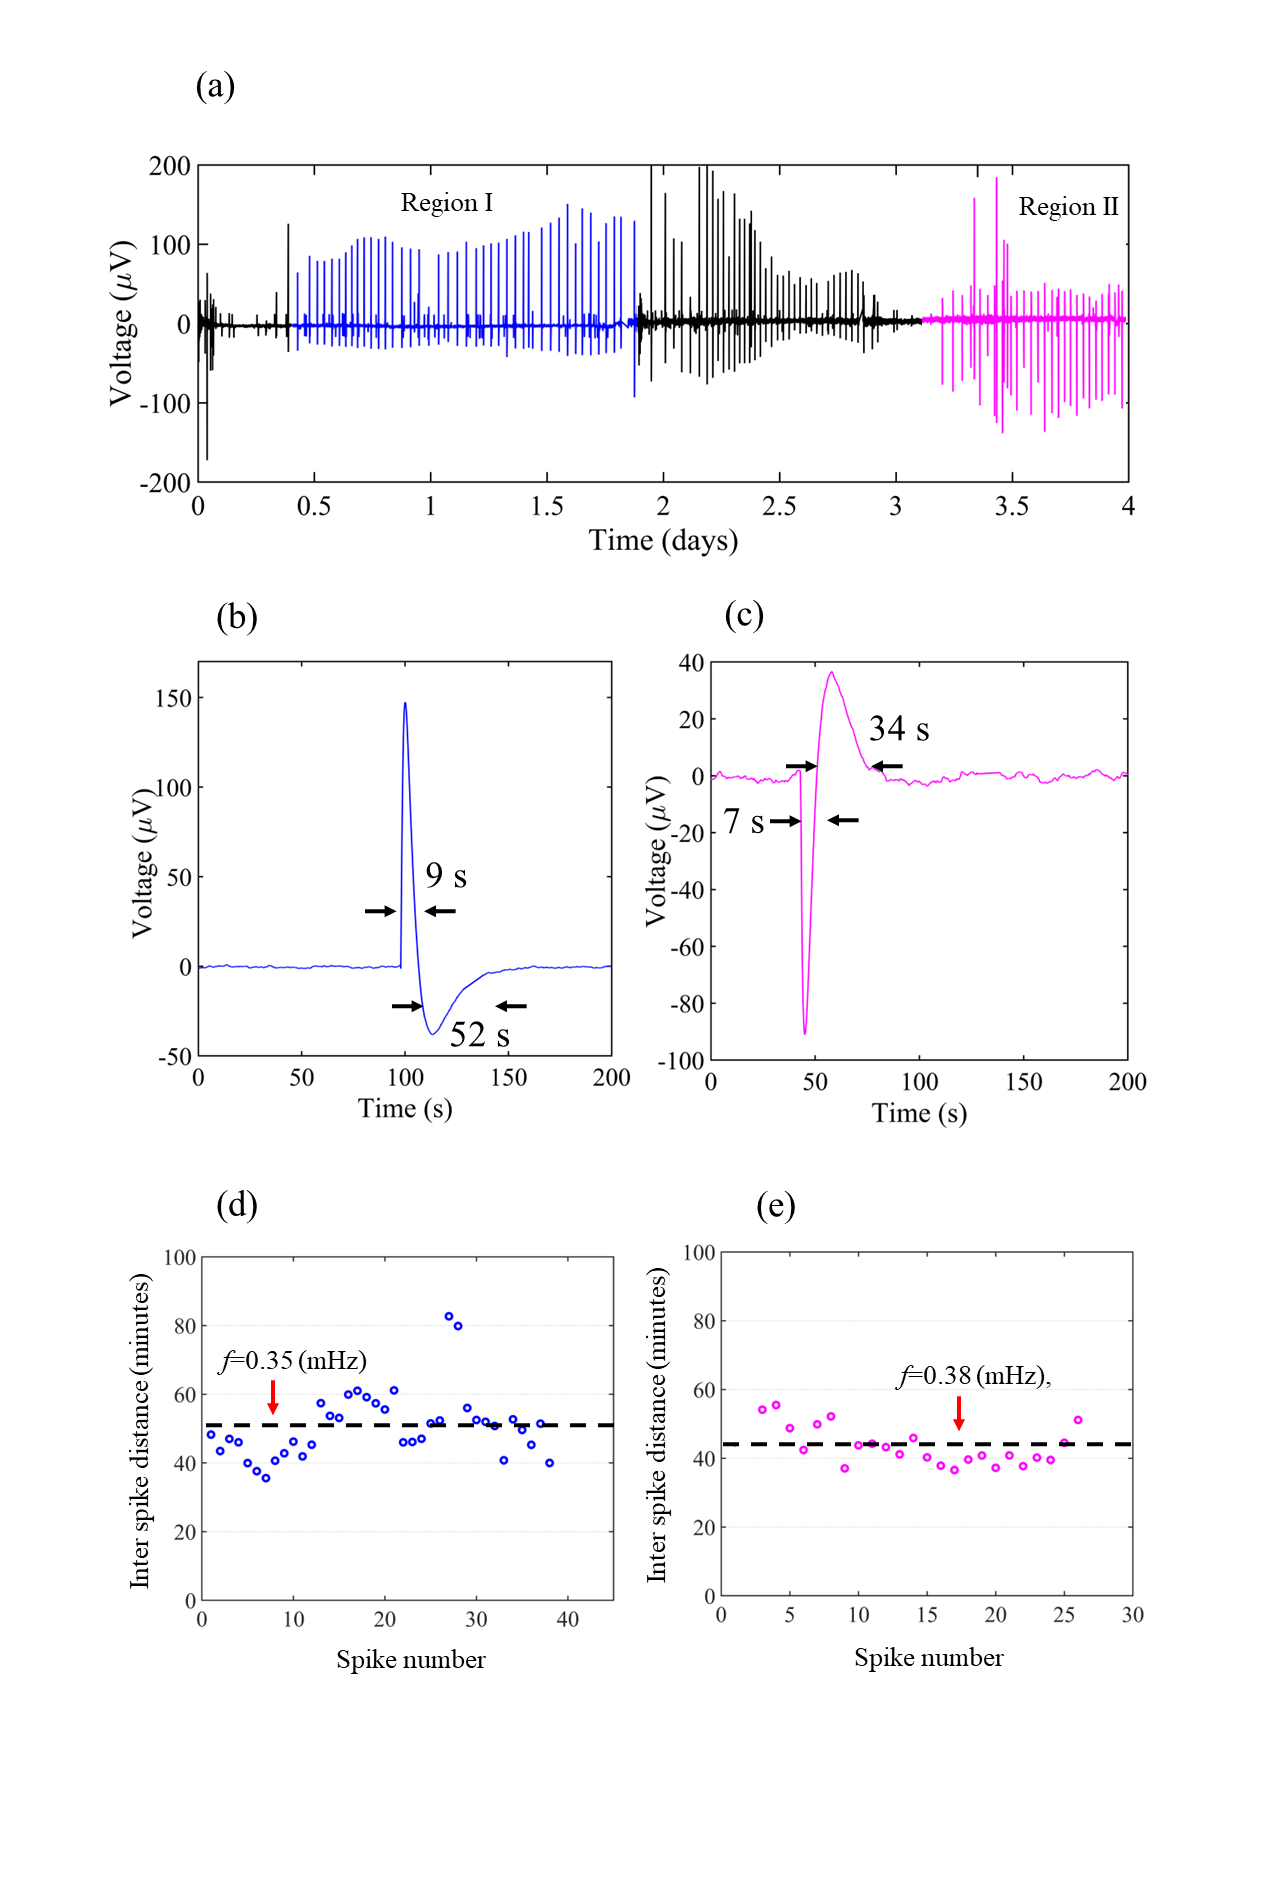


**Figure S4. a**) Time trace of quasi-periodic signals in a stressed cell population in a compact monolayer. **b**) and **c**) a detailed view of the signals in each highlighted region. **d**) and **e)** the time interval between spikes recorded in regions I and region II. The dashed lines represent the average period between spikes.

**Note 4: Onset of quasi-periodic bursts and the master signal.**

Well-defined and quasi-periodic bursts of signals are frequently observed in our experiments. These bursts vary in length, ranging from a few minutes to several days. Some bursts have been linked to the repair of the cell monolayer, as evidenced by the 0.2 mHz (90 minutes) rhythm. Other activities, like the (0.35 mHz) (44 minutes) rhythm, have been detected in both non-injured and injured monolayers.

One relevant aspect often encountered was the occurrence of a single signal with a stronger amplitude that preceded the quasi-periodic activity. This signal has been designated as the “master signal”. The main article presents a clear example of a master signal, while Fig. S5 shows another example of a master signal recorded just before the onset of a 43-minute activity period. The inset provides a closer examination of this master signal, revealing its substantially higher amplitude compared to the other signals that constitute the subsequent activity. It is worth noting that due to the scale settings of the recording amplifier, the master signal's full amplitude could not be precisely recorded. Nevertheless, even with this limitation, the unique and prominent nature of the master signal is clear and sets it apart from the ensuing signals forming the quasi-periodic activity.


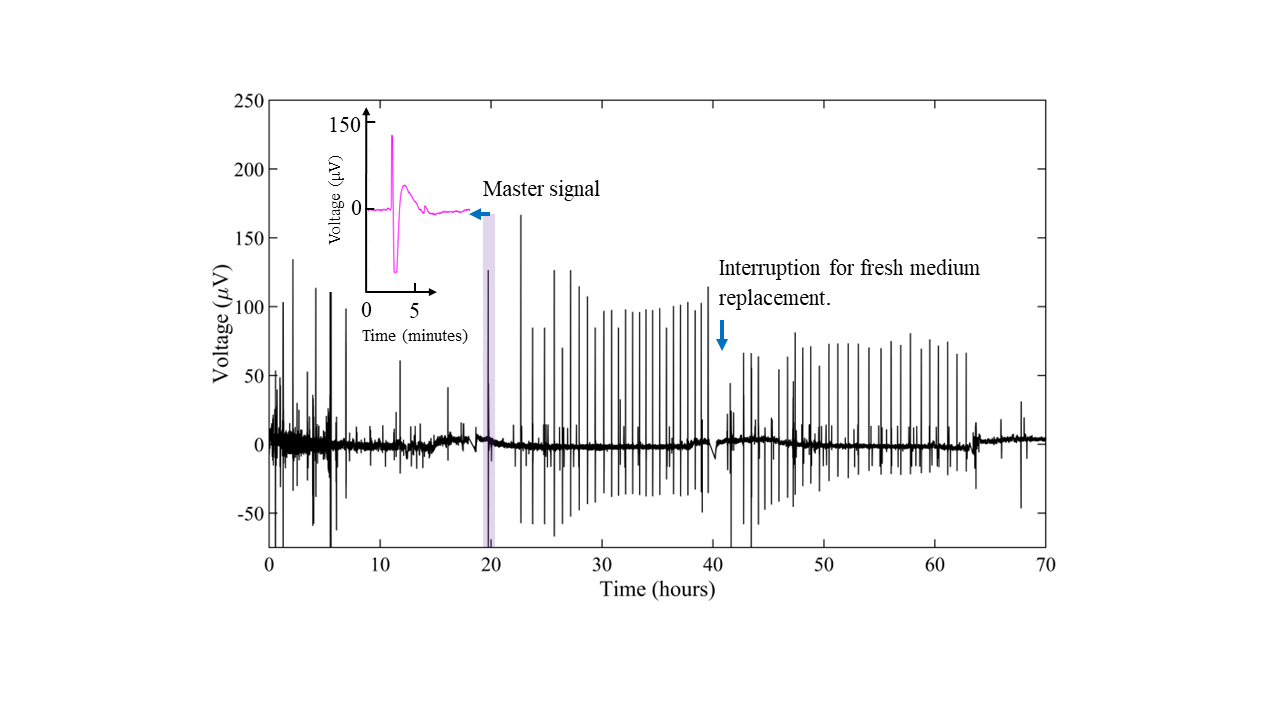


**Figure S5**. The onset of a quasi-periodic activity burst of 0.35 mHz (43 minutes). The activity is preceded by a master signal (pink) that appears isolated. The inset shows a detailed view of the master signal. The signal was significantly higher in amplitude than the other signals that comprise the cell signaling activity. The scale settings of the recording amplifier impeded the recording of the full amplitude of the master signal.

**Note 5: Evidence for cooperative signaling.**

The collected electrophysiological time traces revealed compelling evidence of cell cooperative behavior. It was frequently observed within the collected electrophysiological traces that the signal power increased over time until it reached a steady amplitude. Fig. S6 gives a clear example of this phenomenon, featuring a set of four consecutive signals. The initial signal starts with a weak oscillation (below 5µV), and the second signal already exhibits the characteristics of a biphasic signal. Subsequently, the third and fourth signals display identical shapes but with progressively increasing amplitudes and durations. A reasonable interpretation of this behavior is that clusters of cells organized themselves (synchronize) to generate the oscillation, and with time more cells were recruited into the cluster and became synchronized. The consequence of this successive increase in the number of synchronized cells is that the signal power increases steadily over time as demonstrated in Fig. S6. This signaling behavior highlights the dynamic nature of cellular interactions, where clusters of cells may cooperate and synchronize their activities, leading to a collective increase in signal power over time.


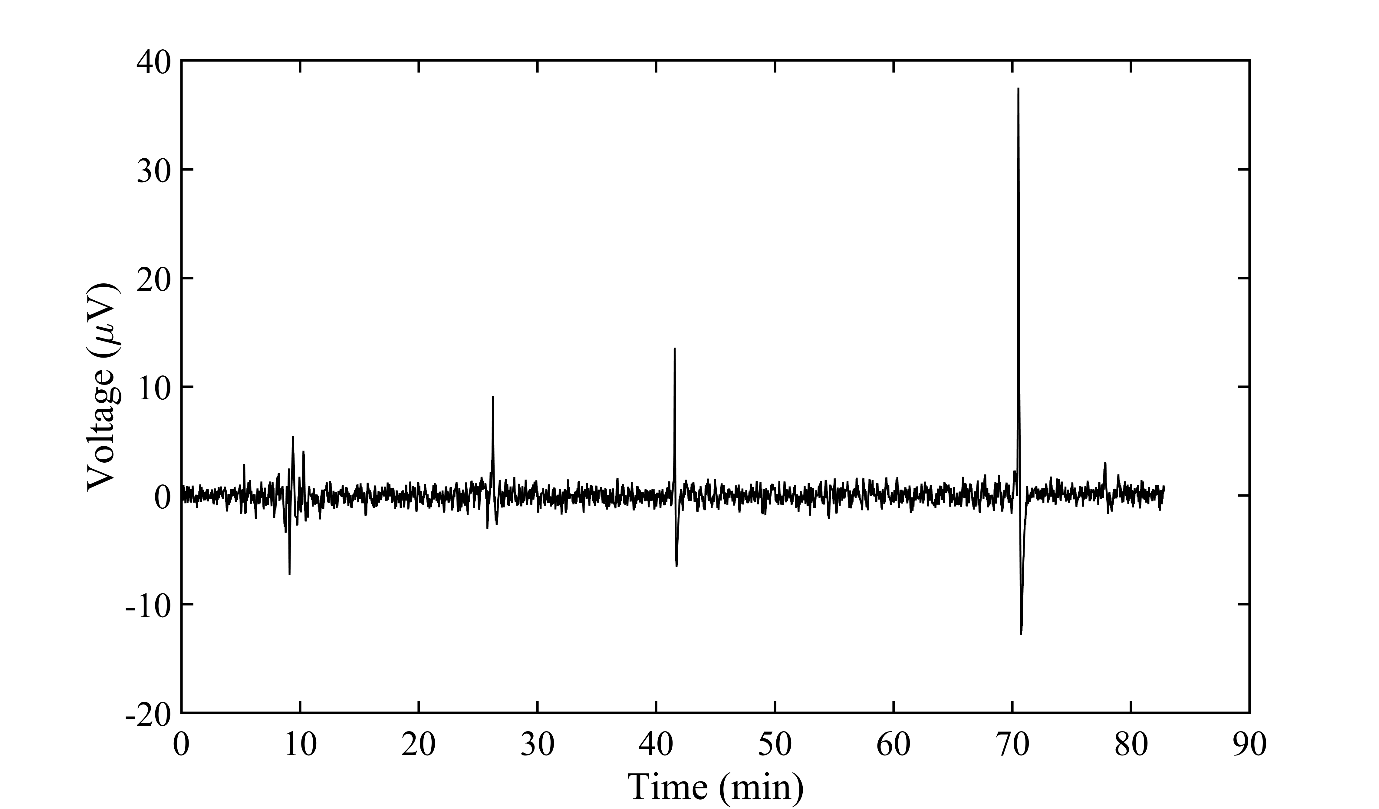


**Figure S6**. Increase in the signal power across time revealed in the recording of 5 consecutive signals.
